# Supplementary material for: Two polyphenol-rich Brazilian fruit extracts protect from diet-induced obesity and hepatic steatosis in mice
Source: Royal Society of Chemistry journal article supplement (doi:10.1039/d0fo01912g), 2020-01-01
Supplement: d0fo01912g1.pdf [file d0fo01912g1.pdf]

## TWO POLYPHENOL-RICH BRAZILIAN FRUIT EXTRACTS PROTECT FROM DIET-INDUCED OBESITY AND HEPATIC STEATOSIS IN MICE

Cíntia Reis Ballard<sup>1</sup>; Elisvânia Freitas dos Santos<sup>2</sup>; Marie-Julie Dubois<sup>3</sup>; Geneviève Pilon<sup>3</sup>; Cinthia Baú Betim Cazarin<sup>1</sup>; Mário Roberto Maróstica Jr<sup>1\*</sup>; Andre Marette<sup>3</sup>

<sup>1</sup> Department of Food and Nutrition, School of Food Engineering, University of Campinas, Campinas, 80 Monteiro Lobato, 13083-862, São Paulo, Brazil: [cintia.reis.ballard@gmail.com](mailto:cintia.reis.ballard@gmail.com); [cbetim@unicamp.br](mailto:cbetim@unicamp.br); [mario@fea.unicamp.br](mailto:mario@fea.unicamp.br)

<sup>2</sup> School of Pharmaceutical Sciences, Food and Nutrition, Federal University of Mato Grosso do Sul, Campo Grande, S/N Costa e Silva, 79070-900, Mato Grosso do Sul, Brazil: [elisvania@gmail.com](mailto:elisvania@gmail.com)

<sup>3</sup> Quebec Heart and Lung Institute, Laval Hospital, Laval University, Quebec City, 2725 Sainte Foy, G1V 4G5, Quebec, Canada: [Marie-Julie.Dubois@criucpq.ulaval.ca](mailto:Marie-Julie.Dubois@criucpq.ulaval.ca); [Genevieve.Pilon@criucpq.ulaval.ca](mailto:Genevieve.Pilon@criucpq.ulaval.ca); [Andre.Marette@criucpq.ulaval.ca](mailto:Andre.Marette@criucpq.ulaval.ca)

\*Corresponding author: Department of Food and Nutrition, School of Food Engineering, University of Campinas, Campinas, Monteiro Lobato 80, 13083-862, São Paulo, Brazil. Email: [mario@fea.unicamp.br](mailto:mario@fea.unicamp.br)

## ELECTRONIC SUPPLEMENTARY INFORMATION

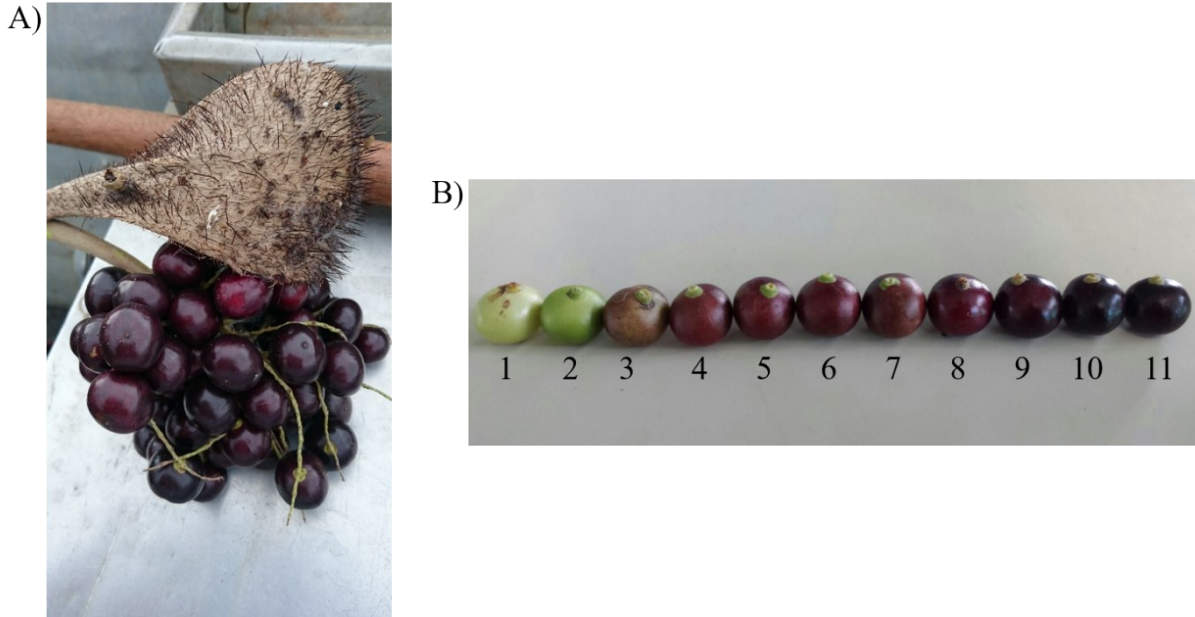

Fig. S1. A) Tucum-do-Pantanal (*Bactris setosa* Mart), B) Stages of fruit ripening (11 used in extract). Photograph by C. R. Ballard. Personal archive images of authors.

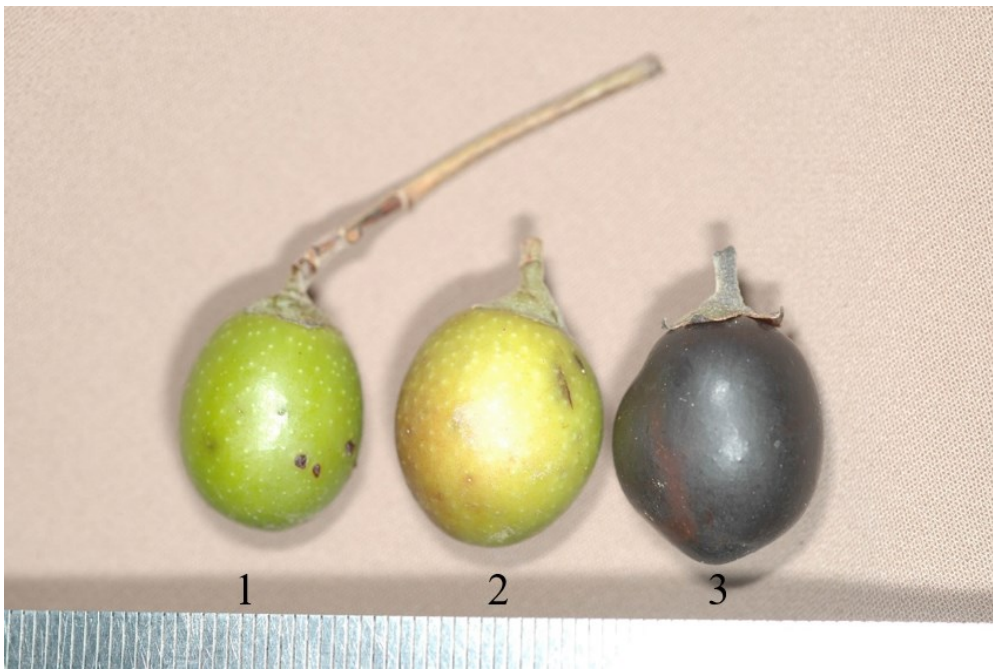

Fig. S2. Taruma-do-Cerrado (*Vitex cymosa* Bertero ex Spreng) in the stages of fruit ripening (ripe -3). Photograph by C. E. Timothy Paine. This work is licensed under the Creative Commons Attribution-Non Commercial 4.0 International License.

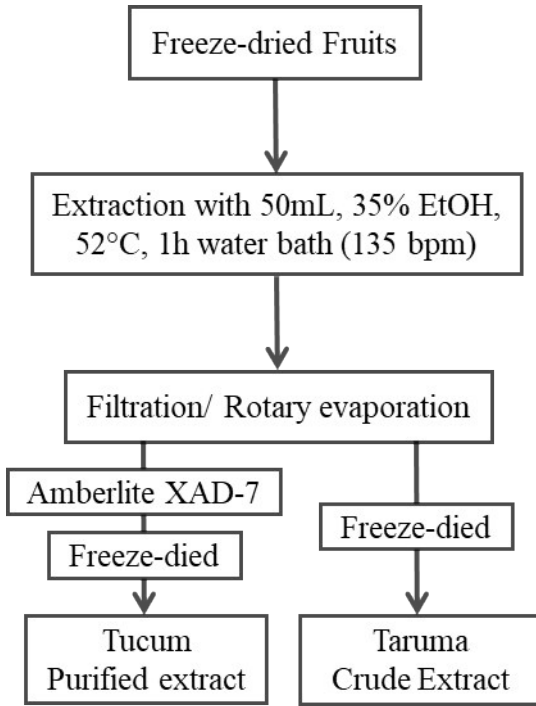

Figure S3. Flow chart of extract procedures

Table S1. Composition of experimental diets.

|                                       | LF*   |        | HF**   |       |
|---------------------------------------|-------|--------|--------|-------|
|                                       | gm%   | kcal%  | gm%    | kcal% |
| Protein                               | 19.2  | 20     | 24     | 20    |
| Carbohydrate                          | 67.3  | 70     | 41     | 35    |
| Fat                                   | 4.3   | 10     | 24     | 45    |
| Total                                 |       | 100    |        | 100   |
| kcal/gm                               | 3.85  |        | 4.73   |       |
| Ingredients                           | gm    | kcal   | gm     | kcal  |
| Casein, 30 Mesh                       | 200   | 800    | 200    | 800   |
| L-Cystine                             | 3     | 12     | 3      | 12    |
| Corn Starch                           | 452.2 | 1808.8 | 72.8   | 291   |
| Maltodextrin 10                       | 75    | 300    | 100    | 400   |
| Sucrose                               | 172.8 | 691.2  | 172.8  | 691.2 |
| Cellulose, BW200                      | 50    | 0      | 50     | 0     |
| Soybean Oil                           | 25    | 225    | 25     | 225   |
| Lard                                  | 20    | 180    | 177.5  | 1598  |
| Mineral Mix S10026                    | 10    | 0      | 10     | 0     |
| DiCalcium Phosphate                   | 13    | 0      | 13     | 0     |
| Calcium Carbonate                     | 5.5   | 0      | 5.5    | 0     |
| Potassium Citrate, 1 H <sub>2</sub> O | 16.5  | 0      | 16.5   | 0     |
| Vitamin Mix V10001                    | 10    | 40     | 10     | 40    |
| Choline Bitartrate                    | 2     | 0      | 2      | 0     |
| FD&C Yellow Dye #5                    | 0.04  | 0      | -      | -     |
| FD&C Red Dye #40                      | 0.01  | 0      | 0.05   | 0     |
| Total                                 | 1055  | 4057   | 858.15 | 4057  |

\*Research Diets #D12450H with 10% kcal% fat, LF, Low Fat.

\*\*Research Diets #D12451 with 45% kcal fat, HFHS, High Fat

Table S2. Primer sequences

| Gene        | Forward (5' - 3')        | Reverse (5' - 3')        |
|-------------|--------------------------|--------------------------|
| <i>Zo-1</i> | ACCCGAAACTGATGCTGTGGATAG | AAATGGCCGGGCAGAACTTGTGTA |
| <i>Ocln</i> | TTTGGCTGCTCTTGGGTCTGTAT  | ATGTCCGGCCGATGCTCTC      |
| <i>Actb</i> | CTCTAGACTTCGAGCAGGAG     | AGAGTACTTGCGCTCAGGAG     |
